# Supplementary material for: Automation of peptide desalting for proteomic liquid chromatography – tandem mass spectrometry by centrifugal microfluidics
Source: Royal Society of Chemistry journal article supplement (doi:10.1039/d1lc00137j), 2021-01-01
Supplement: d1lc00137j3.pdf [file d1lc00137j3.pdf]

## Supplementary Information

### 1 Protein level results of the explorative LC-MS/MS experiment

In total, 2909 proteins were identified in the two sets, with 84% common identifications. As can be seen in Supplementary Figure 1, identifications in the individual sets are comparable.

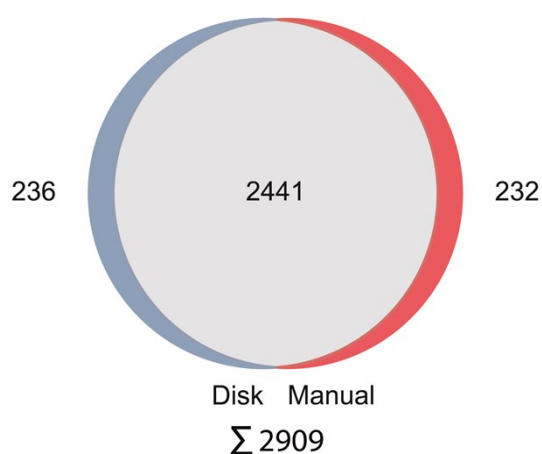

Supplementary Figure 1 Venn diagram illustrating the identifications on protein level for both desalting approaches.
