# Supplementary figures and images for: Automation of peptide desalting for proteomic liquid chromatography – tandem mass spectrometry by centrifugal microfluidics
Source: Royal Society of Chemistry journal article supplement (doi:10.1039/d1lc00137j), 2021-01-01

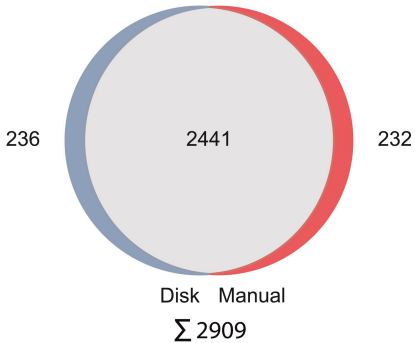

Supplement: d1lc00137j1.pdf [file d1lc00137j1.pdf]
